# Supplementary material for: Binding of Human ACE2 and RBD of Omicron Enhanced by Unique Interaction Patterns Among SARS-CoV-2 Variants of Concern
Source: PubMed Central journal article supplement — bioRxiv. 2022 Jan 25:2022.01.24.477633. Preprint. [Version 1] doi: 10.1101/2022.01.24.477633 (PMC8811907; doi:10.1101/2022.01.24.477633), 2022-01-25
Supplement: media-1.pdf [file media-1.pdf]

## Supplementary Data

### **Binding of Human ACE2 and RBD of Omicron Enhanced by Unique Interaction Patterns Among SARS-CoV-2 Variants of Concern**

Seonghan Kim<sup>1</sup>, Yi Liu<sup>1</sup>, Matthew Ziarnik<sup>1</sup>, Yiwei Cao<sup>2</sup>, X. Frank Zhang<sup>1\*</sup>, Wonpil Im<sup>1,2\*</sup>

<sup>1</sup>Department of Bioengineering, <sup>2</sup>Departments of Biological Sciences, Chemistry, and Computer Science and Engineering, Lehigh University, 111 Research Dr, Bethlehem, PA 18015, USA

\*Correspondence and requests for materials should be addressed to X.F.Z and W.I.  
(emails: xiz310@lehigh.edu and wonpil@lehigh.edu)

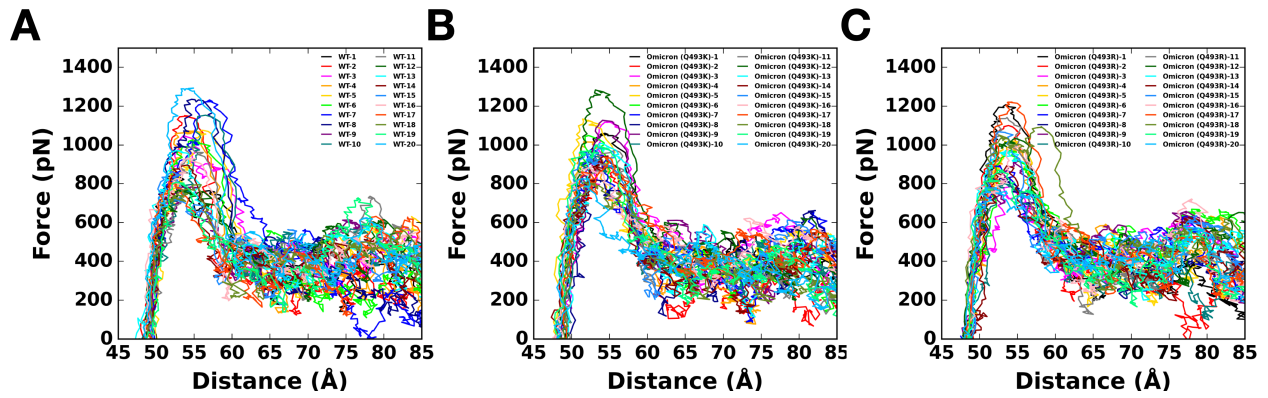

**Figure S1.** Force profiles of 20 replicas of (A) WT, (B) Omicron Q493K, and (C) Omicron Q493R as a function of the distance between the COM of RBD and ACE2.

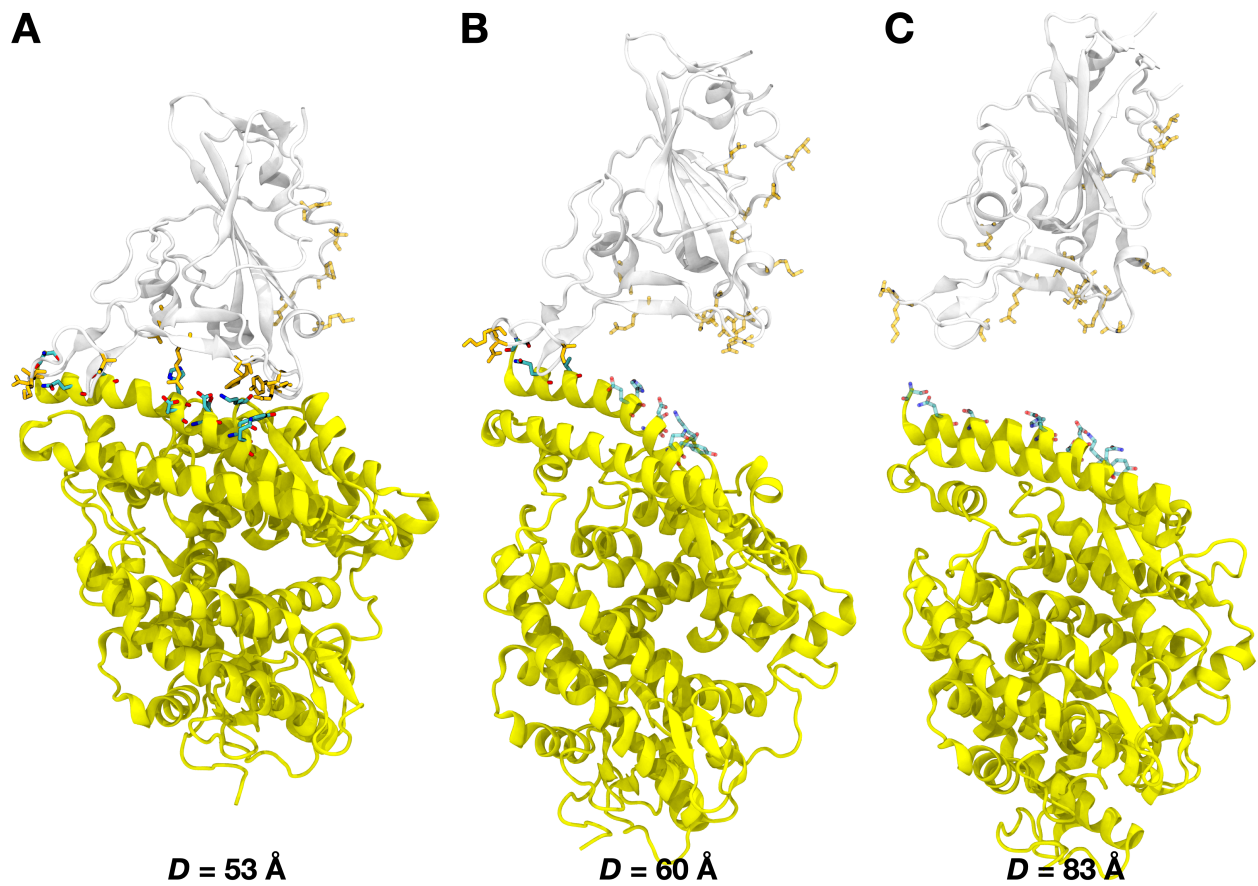

**Figure S2.** Separation process between Omicron RBD and ACE2 at  $D = 53 \text{ \AA}$ ,  $60 \text{ \AA}$ , and  $83 \text{ \AA}$ , respectively. The color scheme is the same as in **Figure 1B**.
